# Supplementary material for: Extracellular vesicles from mast cells induce mesenchymal transition in airway epithelial cells
Source: Springer Nature journal article supplement (doi:10.1186/s12931-020-01346-8), 2020-05-01
Supplement: MOESM1 [file 17948296]

# Supplementary Figure. 1

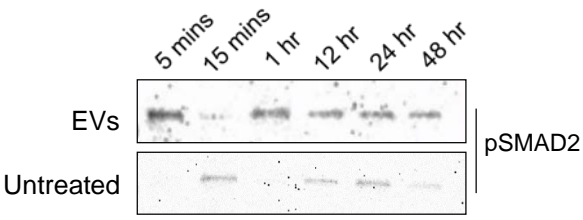

## Supplementary Table 1

|    | Pathway ID | Pathway Description                          | Protein Count |
|----|------------|----------------------------------------------|---------------|
| 1  | 4151       | PI3K-Akt signaling pathway                   | 13            |
| 2  | 5200       | Pathways in cancer                           | 12            |
| 3  | 4066       | HIF-1 signaling pathway                      | 10            |
| 4  | 5206       | MicroRNAs in cancer                          | 9             |
| 5  | 4060       | Cytokine-cytokine receptor interaction       | 9             |
| 6  | 4640       | Hematopoietic cell lineage                   | 8             |
| 7  | 4064       | NF-kappa B signaling pathway                 | 8             |
| 8  | 4630       | Jak-STAT signaling pathway                   | 8             |
| 9  | 4510       | Focal adhesion                               | 8             |
| 10 | 4668       | TNF signaling pathway                        | 7             |
| 11 | 4068       | FoxO signaling pathway                       | 7             |
| 12 | 4380       | Osteoclast differentiation                   | 7             |
| 13 | 4514       | Cell adhesion molecules (CAMs)               | 7             |
| 14 | 5202       | Transcriptional misregulation in cancer      | 7             |
| 15 | 4660       | T cell receptor signaling pathway            | 6             |
| 16 | 4620       | Toll-like receptor signaling pathway         | 6             |
| 17 | 5205       | Proteoglycans in cancer                      | 6             |
| 18 | 4014       | Ras signaling pathway                        | 6             |
| 19 | 4662       | B cell receptor signaling pathway            | 5             |
| 20 | 5322       | Systemic lupus erythematosus                 | 5             |
| 21 | 4530       | Tight junction                               | 5             |
| 22 | 4015       | Rap1 signaling pathway                       | 5             |
| 23 | 4010       | MAPK signaling pathway                       | 5             |
| 24 | 4672       | Intestinal immune network for IgA production | 4             |
| 25 | 4621       | NOD-like receptor signaling pathway          | 4             |
| 26 | 4623       | Cytosolic DNA-sensing pathway                | 4             |
| 27 | 5212       | Pancreatic cancer                            | 4             |
| 28 | 4917       | Prolactin signaling pathway                  | 4             |
| 29 | 5222       | Small cell lung cancer                       | 4             |
| 30 | 4110       | Cell cycle                                   | 4             |
| 31 | 4650       | Natural killer cell mediated cytotoxicity    | 4             |
| 32 | 4145       | Phagosome                                    | 4             |
| 33 | 4062       | Chemokine signaling pathway                  | 4             |
| 34 | 4144       | Endocytosis                                  | 4             |
| 35 | 20         | Citrate cycle (TCA cycle)                    | 3             |
| 36 | 5330       | Allograft rejection                          | 3             |
| 37 | 4370       | VEGF signaling pathway                       | 3             |
| 38 | 4115       | p53 signaling pathway                        | 3             |
| 39 | 4612       | Antigen processing and presentation          | 3             |
| 40 | 4622       | RIG-I-like receptor signaling pathway        | 3             |
| 41 | 4914       | Progesterone-mediated oocyte maturation      | 3             |
| 42 | 1200       | Carbon metabolism                            | 3             |
| 43 | 4725       | Cholinergic synapse                          | 3             |
| 44 | 3440       | Homologous recombination                     | 2             |
| 45 | 3410       | Base excision repair                         | 2             |
| 46 | 5340       | Primary immunodeficiency                     | 2             |
| 47 | 4960       | Aldosterone-regulated sodium reabsorption    | 2             |
| 48 | 5219       | Bladder cancer                               | 2             |

## Supplementary Table 2

|    | Pathway ID | Cellular Component                                         | Protein Count |
|----|------------|------------------------------------------------------------|---------------|
| 1  | GO.0043227 | Membrane-bounded Organelle                                 | 66            |
| 2  | GO.0044444 | Cytoplasmic Part                                           | 47            |
| 3  | GO.0031988 | Membrane-bounded Vesicle                                   | 38            |
| 4  | GO.0031982 | Vesicle                                                    | 37            |
| 5  | GO.0044421 | Extracellular Region Part                                  | 36            |
| 6  | GO.0043233 | Organelle Lumen                                            | 35            |
| 7  | GO.0005576 | Extracellular Region                                       | 35            |
| 8  | GO.0070062 | Extracellular Exosome                                      | 31            |
| 9  | GO.0005829 | Cytosol                                                    | 30            |
| 10 | GO.0005615 | Extracellular Space                                        | 22            |
| 11 | GO.0009986 | Cell Surface                                               | 17            |
| 12 | GO.0009897 | External Side Of Plasma Membrane                           | 15            |
| 13 | GO.0098552 | Side Of Membrane                                           | 14            |
| 14 | GO.0016023 | Cytoplasmic Membrane-bounded Vesicle                       | 14            |
| 15 | GO.0030141 | Secretory Granule                                          | 9             |
| 16 | GO.0031091 | Platelet Alpha Granule                                     | 7             |
| 17 | GO.0031093 | Platelet Alpha Granule Lumen                               | 6             |
| 18 | GO.0045121 | Membrane Raft                                              | 6             |
| 19 | GO.0005604 | Basement Membrane                                          | 5             |
| 20 | GO.0005749 | Mitochondrial Respiratory Chain Complex II<br>(Ubiquinone) | 3             |
| 21 | GO.0045273 | Respiratory Chain Complex II                               | 3             |
